# Supplementary figures and images for: Increased bleeding risk with phosphodiesterase‐5 inhibitors after left ventricular assist device implantation
Source: PubMed Central journal article supplement — ESC Heart Fail. 2021 Apr 5;8(4):2419–27. doi: 10.1002/ehf2.13322 (PMC8318463; doi:10.1002/ehf2.13322), 2021-04-05

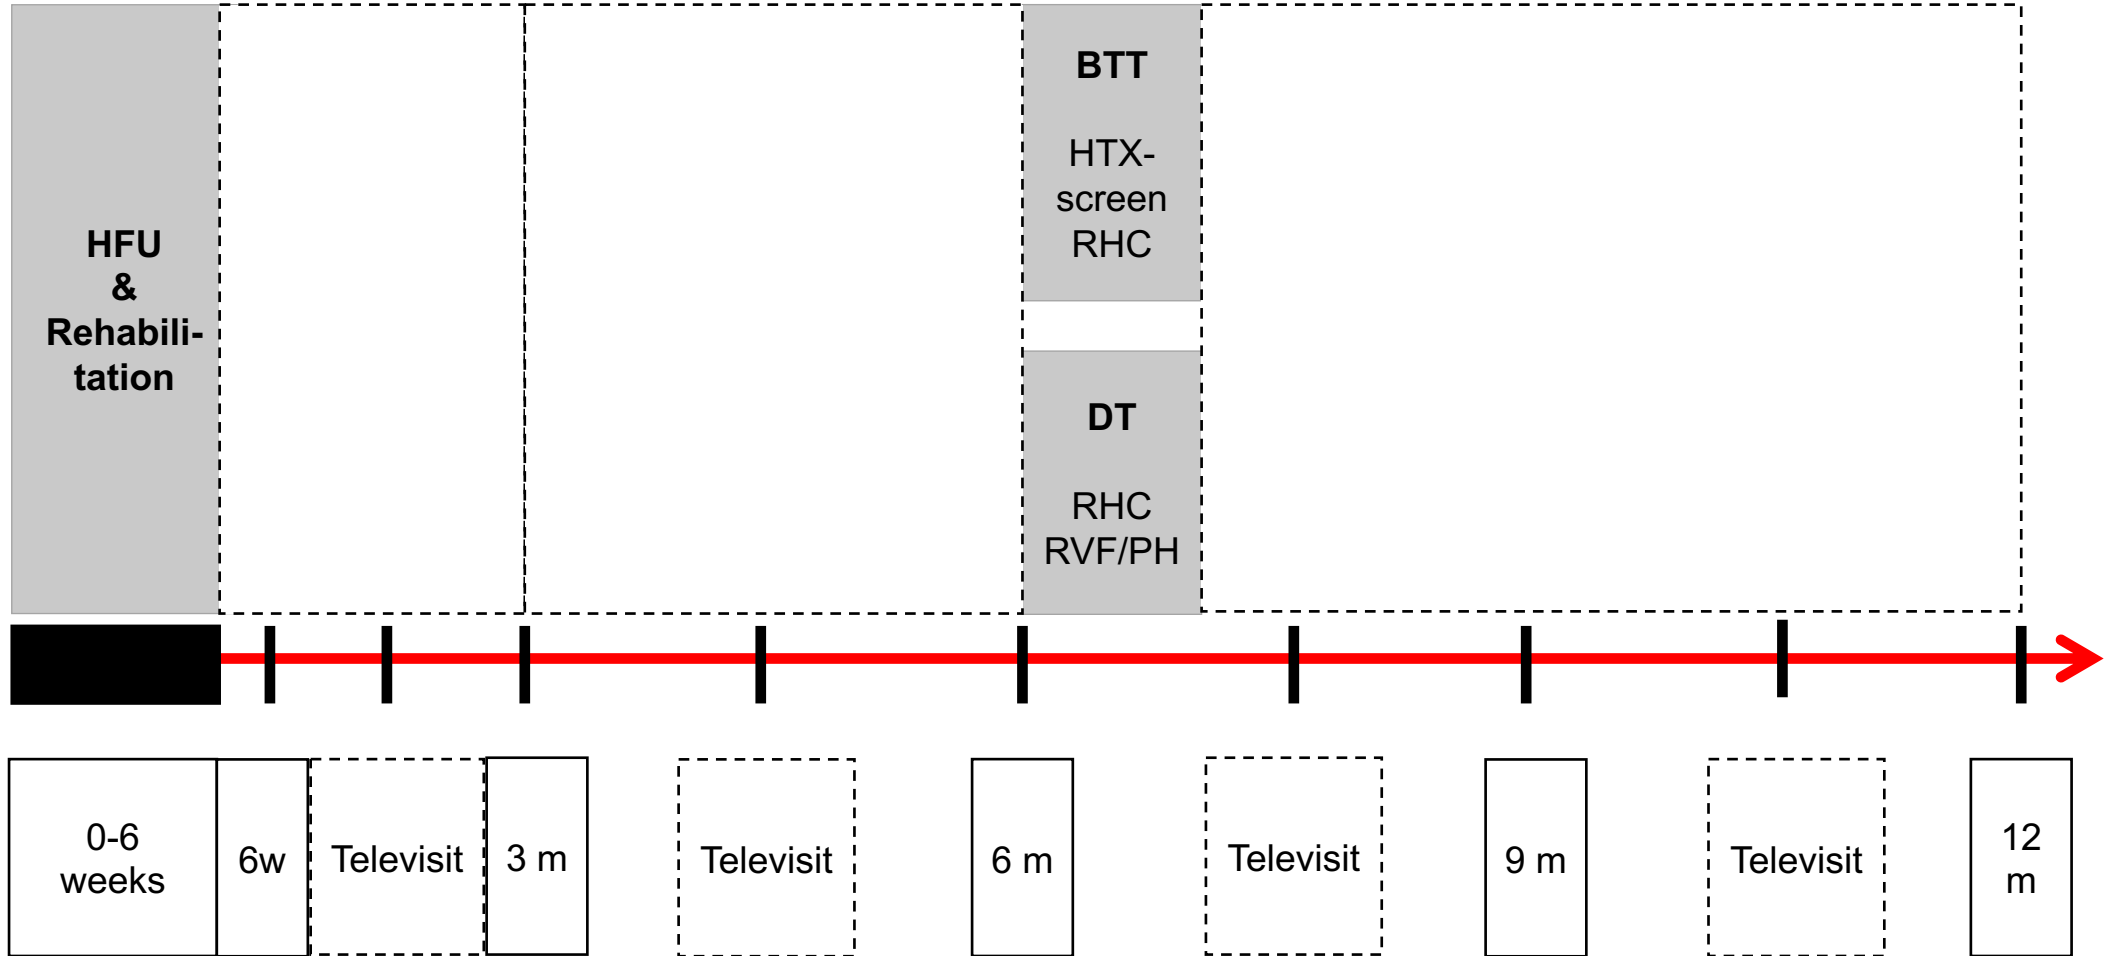

Supplement: EHF2-8-2419-s001.pdf [file EHF2-8-2419-s001.pdf]
